# Supplementary material for: Visible-light-driven oxygen reduction by an anisotropically crystallized CuBi2O4 photocathode fabricated using a mixed metal-imidazole casting method
Source: Royal Society of Chemistry journal article supplement (doi:10.1039/d3ta05260e), 2023-12-08
Supplement: d3ta05260e1.pdf [file d3ta05260e1.pdf]

## Supplementary Materials for

### **Visible-light-driven oxygen reduction by an anisotropically crystallized CuBi<sub>2</sub>O<sub>4</sub> photocathode fabricated using a mixed metal-imidazole casting method**

Ryohei Sekine, Tetsuya Sato, Zaki N. Zahran\*, Yuta Tsubonouchi, Debraj Chandra, Norihisa Hoshino and Masayuki Yagi\*.

Department of Materials Science and Technology, Faculty of Engineering, Niigata University, 8050 Ikarashi-2, Niigata 9050-2181, Japan.

\*Correspondence to: [yagi@eng.niigata-u.ac.jp](mailto:yagi@eng.niigata-u.ac.jp) and [znzahran@eng.niigata-u.ac.jp](mailto:znzahran@eng.niigata-u.ac.jp)

#### **Contents**

- Figure S1. Photos of precursor suspension.
- Figure S2. XPS spectra in a N 1s region
- Figure S3. SEM images after chronoamperometry (CA) for 1 h.
- Figure S4. XPS spectra after CA for 1 h.
- Figure S5. Photos after CA for 24 h.
- Figure S6. SEM images after CA for 24 h.
- Figure S7. XRD spectra after CA for 24 h.
- Figure S8. Calibration curve of analysis of hydrogen peroxide.
- Figure S9. Analysis of hydrogen peroxide produced in photoelectrolysis for ORR.
- Table S1 Comparison of IPCE values among state-of-the-art CuBi<sub>2</sub>O<sub>4</sub> photocathodes.

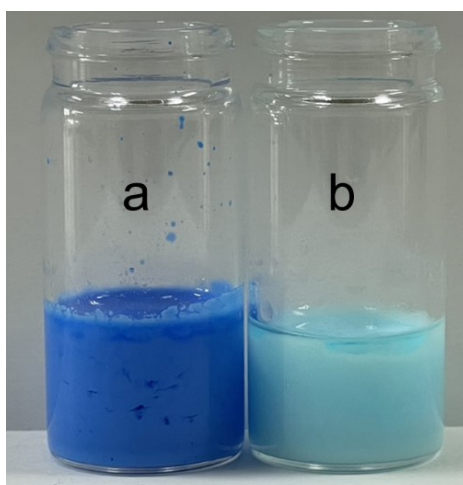

**Figure S1.** Photos of precursor suspensions containing  $\text{Cu}(\text{NO}_3)_2$  and  $\text{Bi}(\text{NO}_3)_3$  (a) with and (b) without MeIm.

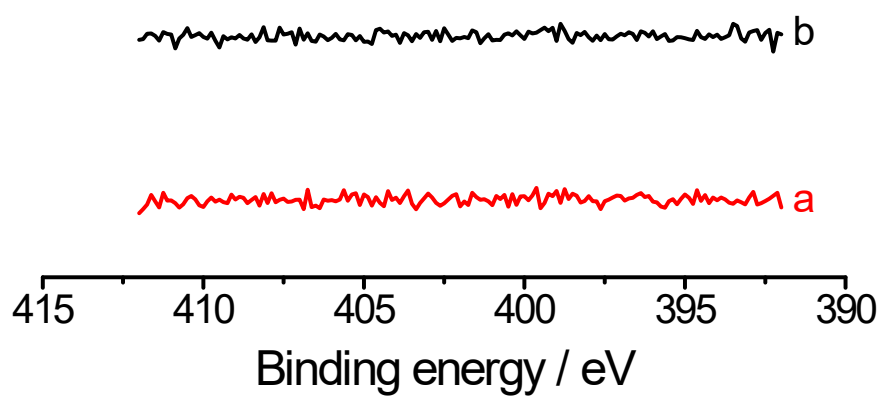

**Figure S2.** XPS spectra of (a)  $\text{CuBi}_2\text{O}_4(w)$  and (b)  $\text{CuBi}_2\text{O}_4(w/o)$  films in a N 1s region.

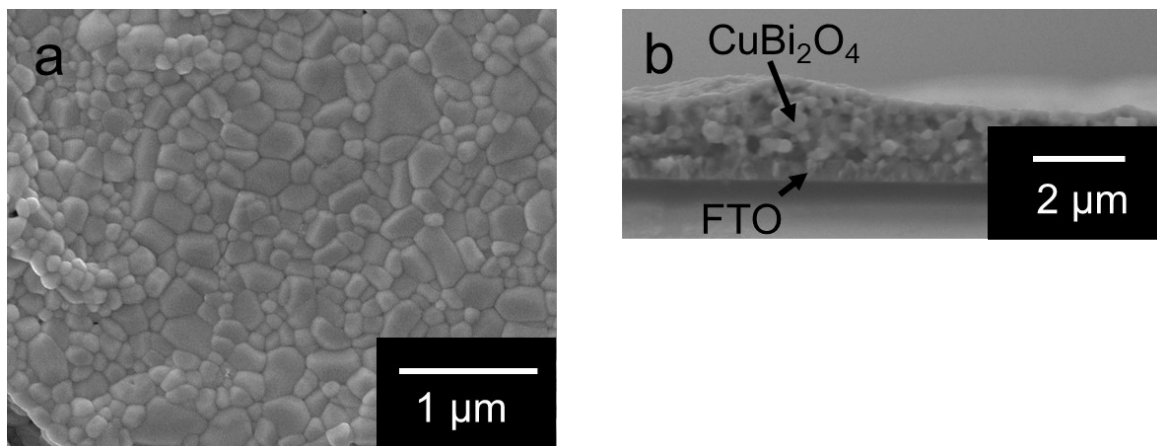

**Figure S3.** Top view SEM images (a) and cross-section view SEM images (b) of  $\text{CuBi}_2\text{O}_4(w)$  after CA at 0.41 V vs. RHE under  $\text{O}_2$  for 1 hour.

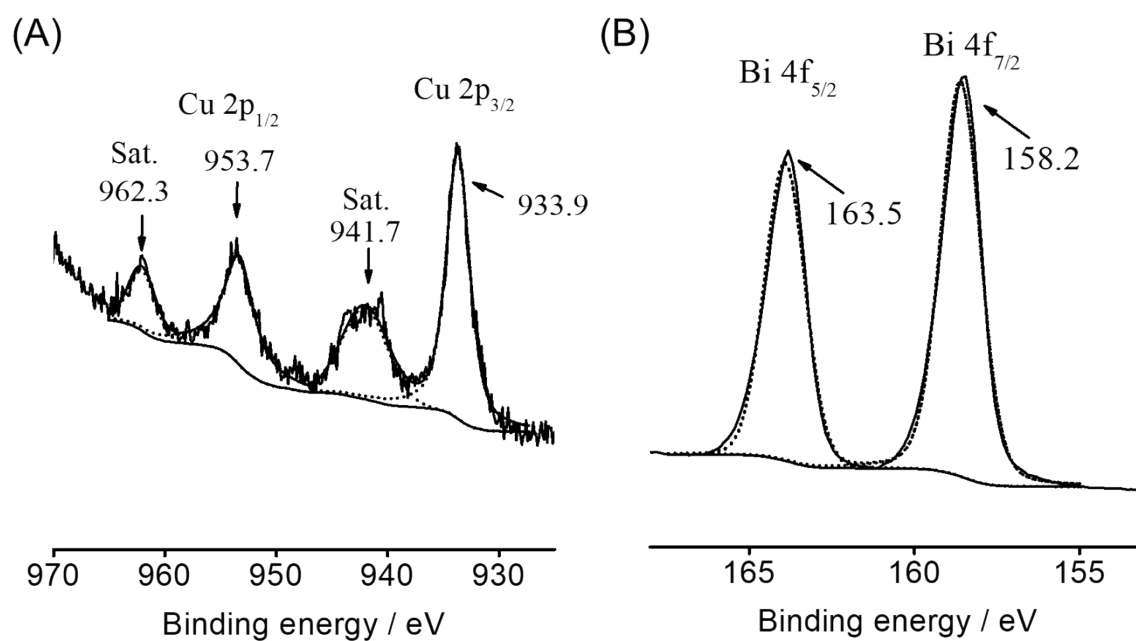

**Figure S4.** XPS spectra of  $\text{CuBi}_2\text{O}_4(w)$  after CA at 0.41 V vs. RHE under  $\text{O}_2$  for 1 hour in (A) Cu 2p and (B) Bi 4f regions. The dotted lines show the deconvoluted bands.

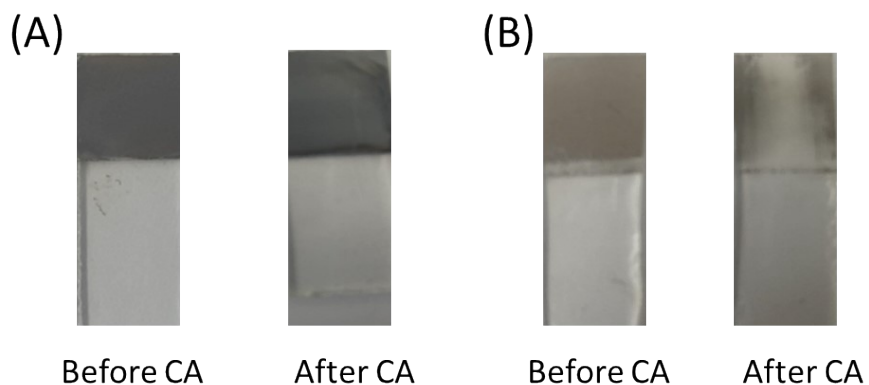

**Figure S5.** Photos of (A)  $\text{CuBi}_2\text{O}_4(w)$  and (B)  $\text{CuBi}_2\text{O}_4(w/o)$  films before (left) and after (right) CA at 0.41 V vs RHE under  $\text{O}_2$  for 24 h.

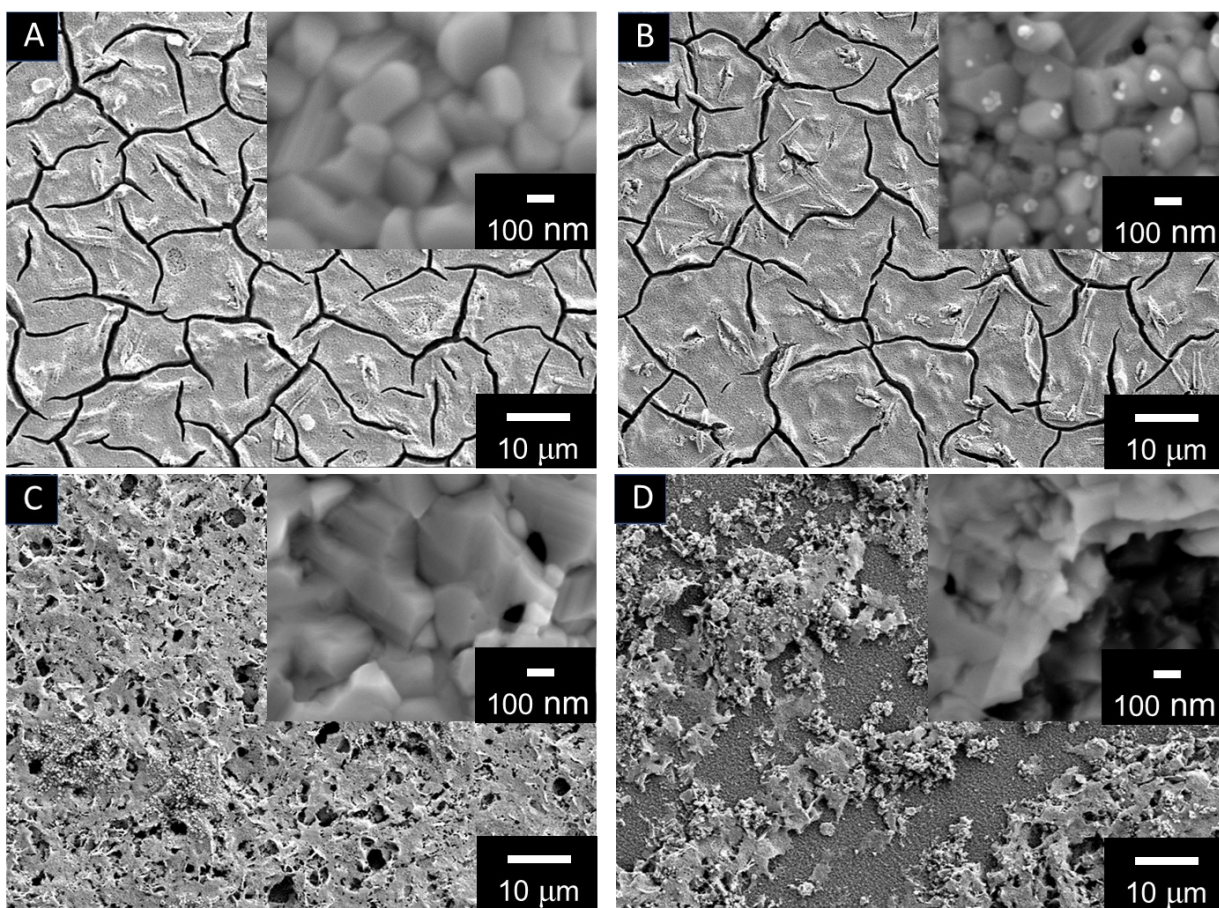

**Figure S6.** Top view SEM images of  $\text{CuBi}_2\text{O}_4(w)$  (A, B) and  $\text{CuBi}_2\text{O}_4(w/o)$  (C, D) films before (A, C) and after (B, D) CA at 0.41 V vs RHE under  $\text{O}_2$  for 24 h.

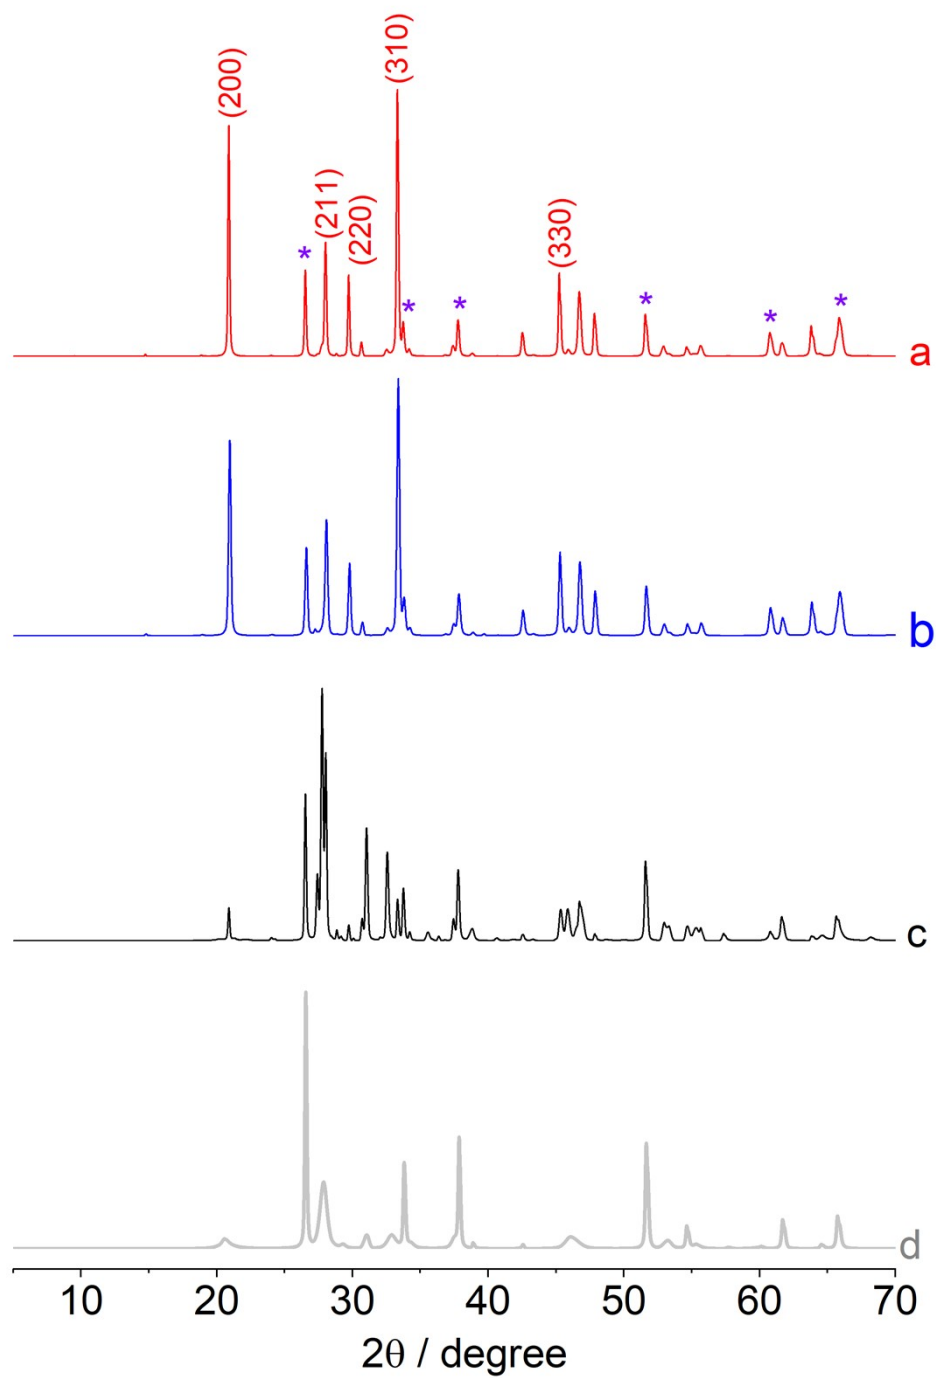

**Figure S7.** XRD patterns of  $\text{CuBi}_2\text{O}_4(w)$  (a, b) and  $\text{CuBi}_2\text{O}_4(w/o)$  (c, d) films before (a, c) and after (b, d) CA at 0.41 V vs RHE under  $\text{O}_2$  for 24 h. The peaks of the FTO substrate are indicated by the purple asterisks in the spectrum a.

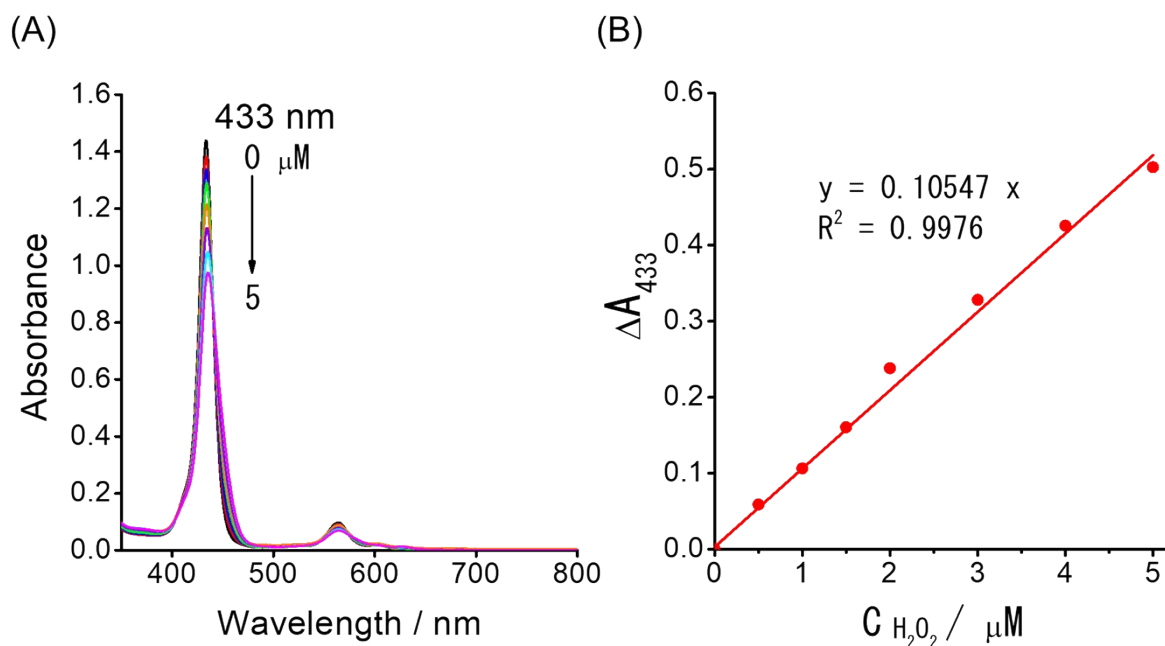

**Figure S8.** Calibration curve of hydrogen peroxide. (A) UV-visible absorption spectra of the aqueous solution (2.5 mL) containing 5  $\mu M$  Ti-TPyP reagent, 5 mM HCl and 0.48 M  $HNO_3$  with the various concentrations ( $c_{H_2O_2}$ ) of hydrogen peroxide. (B) Relationship between the absorbance decrease ( $\Delta A_{433}$ ) at 433 nm and  $c_{H_2O_2}$ .

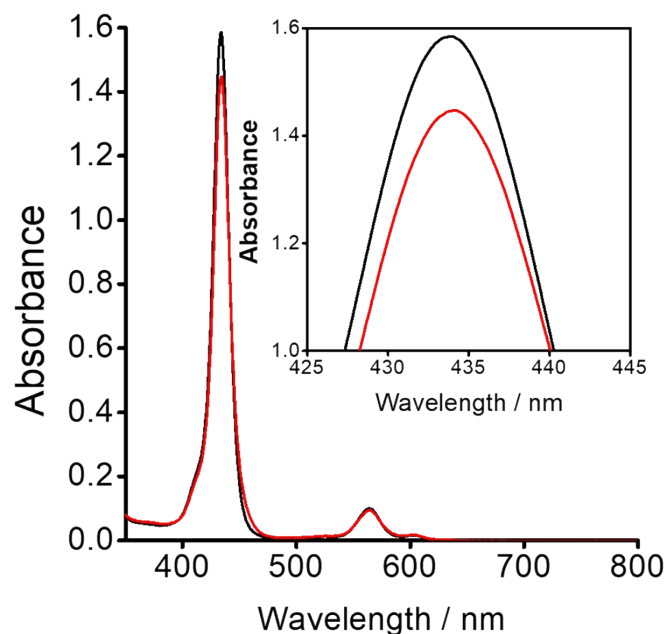

**Figure S9.** UV-visible absorption spectra of the aqueous solution (2.5 mL) containing 5  $\mu M$  Ti-TPyP reagent, 5 mM HCl and 0.48 M  $HNO_3$  with adding the electrolyte solutions before (black) and after (red) the bulk photoelectrolysis for ORR at 0.41 V vs. RHE under  $O_2$  for 1 hour.

**Table S1.** Comparison of IPCE values among state-of-the-art CuBi<sub>2</sub>O<sub>4</sub> photocathodes but being not exclusively for ORR.

| Photocathodes                                                 | Preparation method                 | Conditions                                                                                                   | Applied potential (V vs. RHE) | $\lambda$ (nm) | IPCE (%) | Ref.      |
|---------------------------------------------------------------|------------------------------------|--------------------------------------------------------------------------------------------------------------|-------------------------------|----------------|----------|-----------|
| FTO/CuBi <sub>2</sub> O <sub>4</sub> (w)                      | MiMIC                              | 0.1 M phosphate buffer solution (pH = 7.0) saturated with O <sub>2</sub>                                     | 0.41                          | 440            | 21       | This work |
| FTO/CuBi <sub>2</sub> O <sub>4</sub>                          | Drop cast                          | 0.3 M K <sub>2</sub> SO <sub>4</sub> and 0.2 M phosphate buffer (pH 6.65) with H <sub>2</sub> O <sub>2</sub> | 0.6                           | 440            | 20       | S1        |
| FTO/CuBi <sub>2</sub> O <sub>4</sub>                          | Electrodeposition                  | 0.1 M NaOH solution (pH 12.8) saturated with O <sub>2</sub>                                                  | 0.6                           | 440            | 5        | S2        |
| FTO/CuBi <sub>2</sub> O <sub>4</sub> /Au/N,Cu-C <sup>a)</sup> | Thermal oxidation                  | 0.3 M K <sub>2</sub> SO <sub>4</sub> /0.2 M phosphate buffer solution (pH 6.68) under Ar                     | 0.65                          | 440            | 3        | S3        |
| FTO/CuBi <sub>2</sub> O <sub>4</sub>                          | Spin coating                       | 0.3 M K <sub>2</sub> SO <sub>4</sub> and 0.2 M phosphate buffer (pH 6.65) with H <sub>2</sub> O <sub>2</sub> | 0                             | 440            | 27       | S4        |
| FTO/CuBi <sub>2</sub> O <sub>4</sub> /APTES <sup>b)</sup>     | Electrodeposition and spin coating | 0.1 M KHCO <sub>3</sub> solution (pH = 6.8) saturated with CO <sub>2</sub>                                   | 0.4                           | 440            | 4        | S5        |
| FTO/CuBi <sub>2</sub> O <sub>4</sub>                          | Electrodeposition                  | 0.1M Na <sub>2</sub> SO <sub>4</sub> (pH = 10.8) under Ar                                                    | 0.2                           | 440            | 0.5      | S6        |
| FTO/CuBi <sub>2</sub> O <sub>4</sub>                          | Spin coating                       | 0.3 M K <sub>2</sub> SO <sub>4</sub> and 0.2 M phosphate buffer (pH 6.65) with H <sub>2</sub> O <sub>2</sub> | 0.6                           | 440            | 30       | S7        |

<sup>a)</sup> N, Cu-C : nitrogen/copper co-doped carbon nanosheet, <sup>b)</sup> APTES: 3-aminopropyltriethoxysilane.

## References

- S1 S. P. Berglund, F. F. Abdi, P. Bogdanoff, A. Chemseddine, D. Friedrich and R. Van De Krol, *Chem. Mater.*, 2016, **28**, 4231–4242.  
S2 D. Kang, J. C. Hill, Y. Park and K. Choi, *Chem. Mater.*, 2016, **28**, 4331–4340.  
S3 N. Xu, F. Li, L. Gao, H. Hu, Y. Hu, X. Long, J. Ma and J. Jin, *ACS Sustain. Chem. Eng.*, 2018, **6**, 7257–7264.

- S4 D. A. Reddy, Y. Kim, P. Varma, M. Gopannagari, K. A. J. Reddy, D. H. Hong, I. Song, D. P. Kumar and T. K. Kim, *ACS Appl. Energy Mater.*, 2022, **5**, 6050–6058.
- S5 J. Jin, J. Hu, J. Qu, G. Cao, Y. Lei, Z. Zheng, X. Yang and C. M. Li, *ACS Appl. Mater. Interfaces*, 2022, **14**, 17509–17519.
- S6 N. T. Hahn, V. C. Holmberg, B. A. Korgel and C. B. Mullins, *J. Phys. Chem. C*, 2012, **116**, 6459–6466.
- S7 Y. Xu, J. Jian, F. Li, W. Liu, L. Jia and H. Wang, *J. Mater. Chem. A*, 2019, **7**, 21997–22004.
